# Supplementary material for: Integrating Artificial Intelligence in Pediatric Healthcare: Parental Perceptions and Ethical Implications
Source: MDPI journal article supplement (doi:10.3390/children11020240), 2024-02-14
Supplement: s1 [file s1]

Supplementary Materials – The final questionnaire

1A. Your age is ..... years      1A. The age of YOUR CHILD is ..... years

2. Gender: (CHECK THE CORRECT BOX)

☐ Male      ☐ Female      ☐ Other/Prefer not to answer

3. Occupation:

☐ Student   ☐ Healthcare Professional   ☐ Professional in another field   ☐ Retired  
☐ Other

4. Education level:

☐ Elementary School   ☐ High School   ☐ University   ☐ Postgraduate

5. Have you heard of the term "artificial intelligence" (AI)? (CHECK THE CORRECT BOX)

☐ Yes      ☐ No

6. Do you believe AI is used in medicine?

☐ Yes      ☐ No      ☐ Not sure

7. Do you believe AI is used in medicine IN ROMANIA?

☐ Yes      ☐ No      ☐ Not sure

8. Do you believe AI has ALREADY been used in medicine for your child?

☐ Yes      ☐ No      ☐ Not sure

9. To what extent do you agree with the use of AI by YOUR CHILD'S FAMILY DOCTOR?

☐ Strongly agree   ☐ Agree   ☐ Neutral   ☐ Disagree   ☐ Strongly disagree

10. To what extent do you agree with the use of AI FOR EMERGENCY SITUATIONS FOR YOUR CHILD?

- ☐ Strongly agree    ☐ Agree    ☐ Neutral    ☐ Disagree    ☐ Strongly disagree

11. To what extent do you agree with the use of AI in SURGERY FOR YOUR CHILD?

- ☐ Strongly agree    ☐ Agree    ☐ Neutral    ☐ Disagree    ☐ Strongly disagree

12. To what extent do you agree with the use of AI IN RADIOLOGY OR MRI FOR YOUR CHILD?

- ☐ Strongly agree    ☐ Agree    ☐ Neutral    ☐ Disagree    ☐ Strongly disagree

13. To what extent do you prefer medical decisions based solely on AI compared to those based on human reasoning?

- ☐ Prefer MEDICAL DECISIONS BASED solely on AI  
☐ Prefer MEDICAL DECISIONS BASED on a mix of AI and my doctor's reasoning  
☐ Prefer MEDICAL DECISIONS BASED solely on my doctor's reasoning

14. Would you be more accepting of the use of AI in medicine if it resulted in: (check as many options as relevant)

- ☐ Lower costs for me  
☐ Shorter waiting times and faster appointments with the doctor  
☐ Higher accuracy in diagnosis  
☐ Personalized treatments  
☐ Other (please specify) \_\_\_\_\_

15. What are your main concerns regarding the use of AI in medicine? (Select all relevant options)

- ☐ AI can make errors  
☐ Using AI loses the human connection with the doctor  
☐ The use of AI will lead to the loss of confidentiality of my personal data  
☐ The use of AI will create excessive dependence on technology  
☐ Other (please specify) \_\_\_\_\_

16. How important is it to you that medical decisions are supervised or reviewed by a human doctor?

- ☐ Very important   ☐ Important   ☐ Neutral   ☐ Slightly important   ☐ Not important at all

17. Do you believe parental consent is necessary for the use of AI in the diagnosis or treatment of YOUR CHILD?

- ☐ Yes, always  
☐ Only in life or death decisions  
☐ No, it is not necessary

18. In case parental consent is required for the use of AI, how much information should this consent include?

- ☐ A VERY detailed consent, including a description of the AI process, benefits, and potential risks  
☐ A DETAILED BUT SHORTER consent, presenting the benefits and general use of AI  
☐ A VERY SHORT consent, mentioning only that AI will be used in treatment  
☐ I have no formed opinion

19. How should parental information about the use of AI in their CHILD'S medical care be approached?

- ☐ Through detailed discussions with the doctor  
☐ Through written or digital informative materials  
☐ Through counseling sessions or educational seminars  
☐ Other methods (please specify)

20. To what extent should PARENTS be able to refuse the use of AI in their CHILD'S treatment?

- ☐ Completely - PARENTS should have complete control  
☐ Partially - PARENTS should have a SAY BUT IN THE END THE DOCTOR WILL DECIDE  
☐ Not at all - decisions should be made exclusively by doctors  
☐ Not sure

21. What are your main ethical concerns regarding the use of AI in medicine? (Select all relevant options)

- ☐ With AI, you can no longer be sure where your child's medical information goes and who uses it
- ☐ With AI, you can no longer be sure that medical decisions are fair and the same for everyone regardless of wealth or connections
- ☐ With AI, you can no longer understand who decides for your child and why a certain decision was made
- ☐ With AI, there is an increased risk of a machine making a wrong decision for your child
- ☐ With AI, you no longer have the same human connection with your doctor
- ☐ Other concerns (please specify)

22. How important are the following aspects related to the ethics of AI usage in medicine to you? (RATE ON A SCALE FROM 0 – NOT IMPORTANT TO 10 – EXTREMELY IMPORTANT)

Informed consent .....

Patient's right to choose.....

Equality of access to AI-assisted treatments.....

Accountability for AI errors.....
